# Supplementary material for: Water-Resistant Surface Modification of Hydrophobic Polymers with Water-Soluble Surfactant Additives
Source: MDPI journal article supplement (doi:10.3390/polym13193407), 2021-10-03
Supplement: s1 [file s1]

Supporting Information

# Water-Resistant Surface Modification of Hydrophobic Polymers with Water-Soluble Surfactant Additives

Colin P. Gibson <sup>1</sup>, Matthew A. Litwinowicz <sup>1</sup>, Rebecca J. L. Welbourn <sup>2</sup>, Maximilian W. A. Skoda <sup>2</sup>, Jan Claussen<sup>3</sup> and Richard L. Thompson <sup>1,\*</sup>

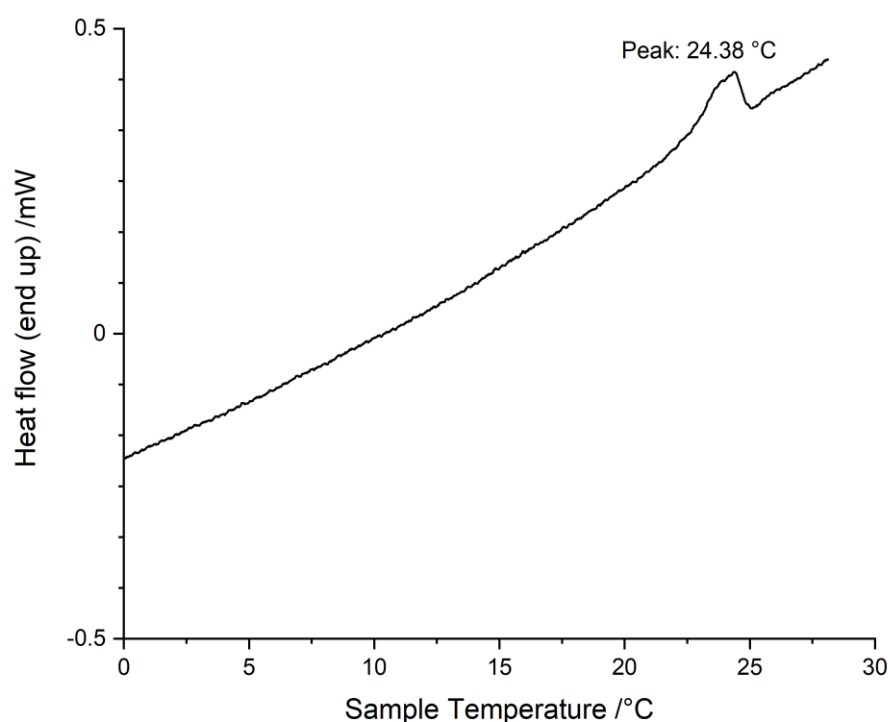

**Figure S1.** DSC Thermogram of cis-PI heated at 10 °C per min. The peak with a maximum at 24.38 °C shows the melting transition of the cis-PI.

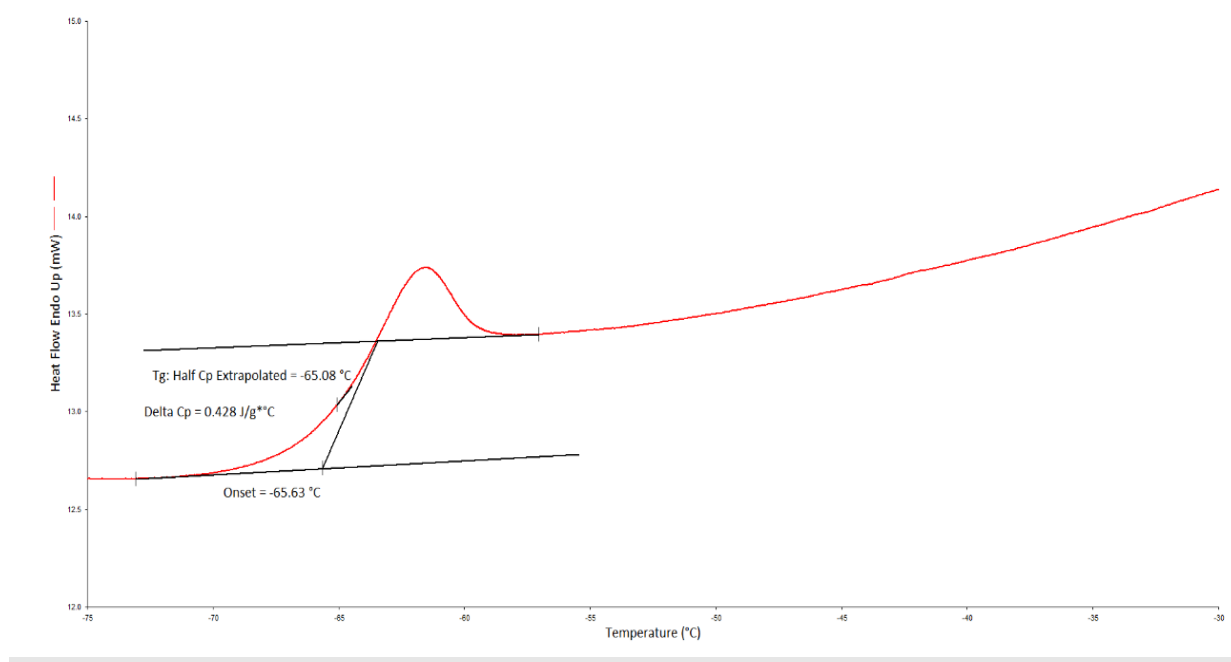

**Figure S2.** Raw DSC data of cis-PI, showing the glass transition at  $-65.08^{\circ}\text{C}$ , calculated from the extrapolated half  $C_p$  point.

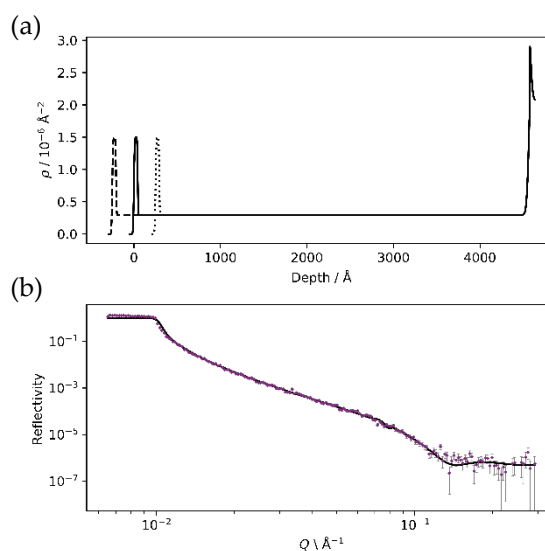

**Figure S3.**(a) sld profile for 1% C12E5 in cis-PI at  $20^{\circ}\text{C}$  illustrating how the data is fitted. The three sld profiles shown have different bulk layer thickness and the difference in thickness between each profile is  $250\text{ Å}$ . (b) The averaged predicted reflectivity profile from each of these model sld profiles, which was fitted to the experimental data.

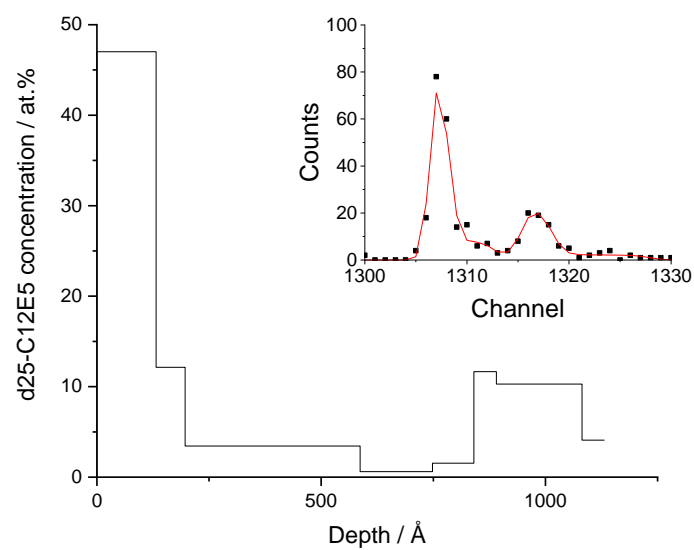

**Figure S4.** Nuclear reaction analysis depth profile of 10% d<sub>25</sub>-C<sub>12</sub>E<sub>5</sub> in *cis*-PI showing a surface excess. Inset: Fitted NRA data used to obtain the depth profile.

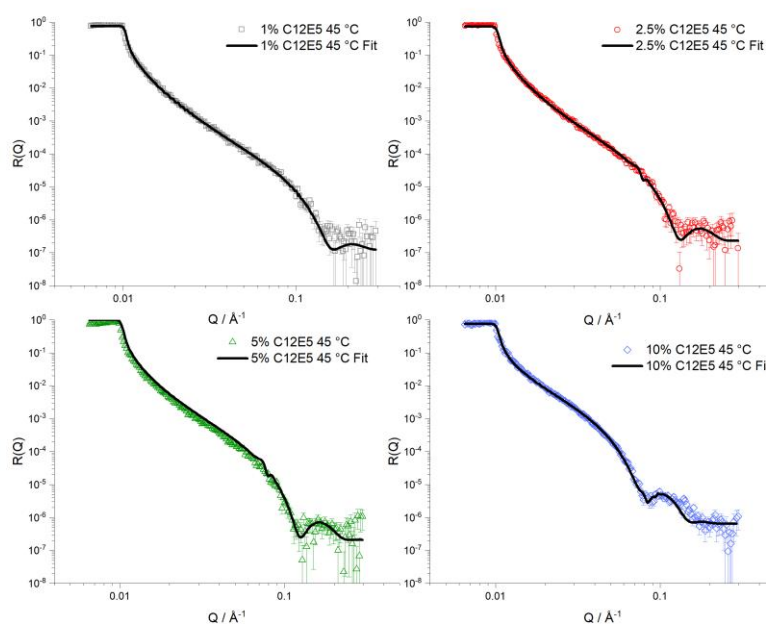

**Figure S5.** NR data and fits for 1 to 10% d<sub>25</sub>-C<sub>12</sub>E<sub>5</sub> in *cis*-PI at 45 °C.

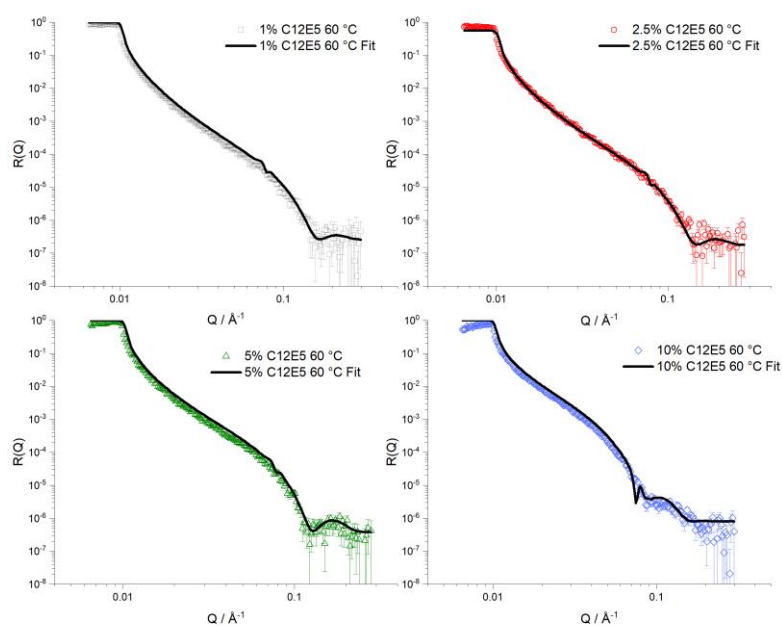

Figure S6. NR data and fits for 1 to 10%  $d_{25}$ -C12E5 in *cis*-PI at 60 °C.

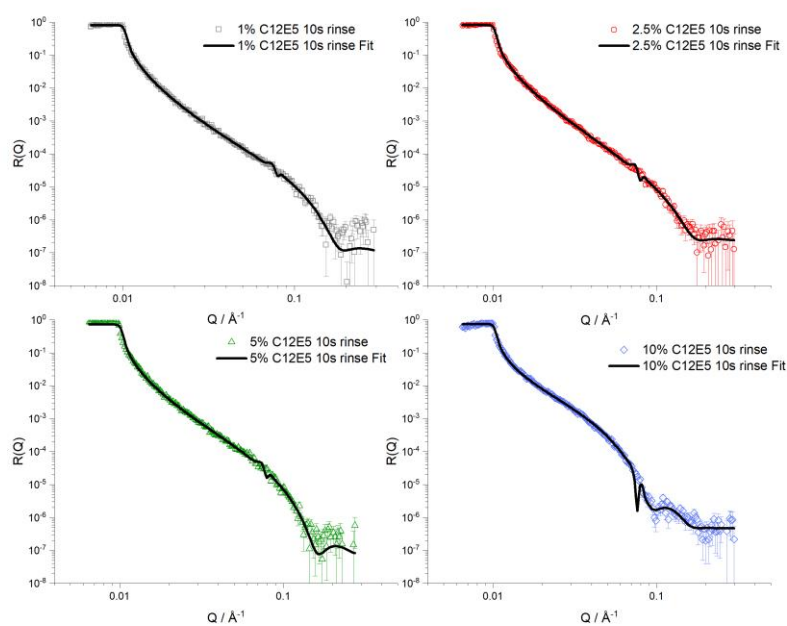

Figure S7. NR data and fits for 1 to 10%  $d_{25}$ -C12E5 in *cis*-PI after a 10s rinse.

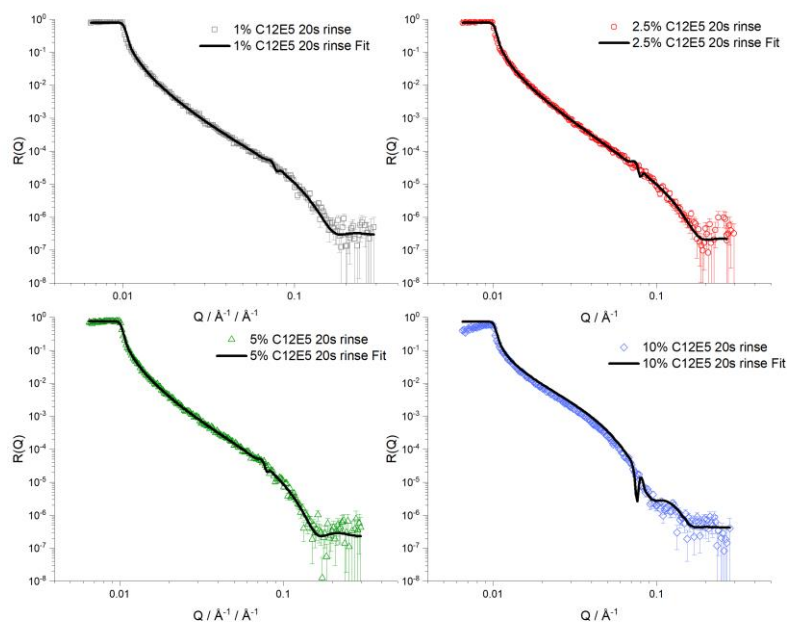

**Figure S8.** NR data and fits for 1 to 10% d25-C12E5 in cis-PI after a 20s rinse.

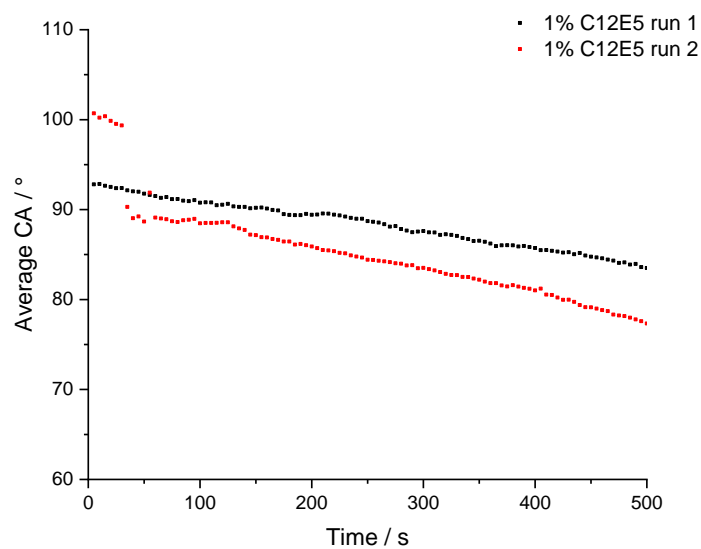

**Figure S9.** Two successive measurements of contact angle on 2 distinct locations on a single 1% C12E5 / cis-PI sample, showing the variability of results.
